# 1 Suboptimal eye movements for 2 seeing fine details

3  
4 Mehmet N. Ağaoğlu\*, Christy K. Sheehy<sup>3</sup>, Pavan Tiruveedhula<sup>1</sup>, Austin Roorda<sup>1,2</sup>, Susana T.L. Chung<sup>1,2</sup>

5 <sup>1</sup>School of Optometry, University of California, Berkeley

6 <sup>2</sup>Vision Science Graduate Group, University of California, Berkeley

7 <sup>3</sup>Department of Neurology, University of California, San Francisco

8 \*corresponding author, lead contact: [mnagaoglu@gmail.com](mailto:mnagaoglu@gmail.com)

9

10

## 11 **Abstract**

12 Human eyes are never stable, even during attempts of maintaining gaze on a visual target. Considering  
13 transient response characteristics of retinal ganglion cells, a certain amount of motion of the eyes is  
14 required to efficiently encode information and to prevent neural adaptation. However, excessive motion  
15 of the eyes leads to insufficient exposure to the stimuli which creates blur and reduces visual acuity.  
16 Normal miniature eye movements fall in between these extremes but it is unclear if they are optimally  
17 tuned for seeing fine spatial details. We used a state-of-the-art retinal imaging technique with eye  
18 tracking to address this question. We sought to determine the optimal gain (stimulus/eye motion ratio)  
19 that corresponds to maximum performance in an orientation discrimination task performed at the  
20 fovea. We found that miniature eye movements are tuned, but may not be optimal, for seeing fine  
21 spatial details.

22

23

24

## 25 Introduction

26 We make large, rapid, voluntary eye movements – saccades, to redirect our gaze to accomplish  
27 numerous visual tasks (e.g., searching for an object, reading a book, etc.) (Kowler, 2011). This is to form  
28 a fine-grained representation of the external world by taking advantage of a part of the retina – the  
29 fovea, which has the highest spatial resolution. However, our eyes are always in motion between epochs  
30 of saccades, even when we try to maintain our gaze on an object. Miniature eye movements that we  
31 make during fixation are often referred to as fixational eye movements (FEM). Different types of FEM  
32 have been identified depending on their spatiotemporal characteristics (Martinez-Conde, Macknik, &  
33 Hubel, 2004; Rucci & Poletti, 2015). Microsaccades are small jerky eye movements, and share similar  
34 peak velocity-amplitude dynamics as larger saccades (Otero-Millan, Troncoso, Macknik, Serrano-  
35 Pedraza, & Martinez-Conde, 2008). Drifts are relatively slower and smoother but rather erratic eye  
36 movements that occur between (micro) saccades, and have been usually modeled as various types of  
37 random walk or Brownian motion (Burak, Rokni, Meister, & Sompolinsky, 2010; Engbert, Mergenthaler,  
38 Sinn, & Pikovsky, 2011; Rucci, Iovin, Poletti, & Santini, 2007). Lastly, tremors are usually defined as very  
39 low-amplitude and high-frequency oscillatory movements that are superimposed on drifts (Ditchburn &  
40 Ginsborg, 1953; Ko, Snodderly, & Poletti, 2016; Ratliff & Riggs, 1950).

41 In addition to the non-uniform distribution of density and size of receptive fields of ganglion cells across  
42 the retina (Curcio, Sloan, Kalina, & Hendrickson, 1990; Dacey & Petersen, 1992; A. B. Watson, 2016),  
43 there is another unique property that differentiates our visual system from a computer vision system –  
44 neural adaptation. For instance, retinal ganglion cells (RGC) are most responsive to light transients and  
45 their responses decay with prolonged exposure (Benardete & Kaplan, 1997; Kaplan & Benardete, 1999).  
46 Although such a system is ideal for the detection of changes or movements that are crucial for survival  
47 in a natural setting, it comes with a consequence. It has been known that in the absence of FEM, visual  
48 perception fades away, and more so for small visual stimuli (Ditchburn & Ginsborg, 1952; Riggs, Ratliff,  
49 Cornsweet, & Cornsweet, 1953; Yarbus, 1967). This suggests that retinal image motion is essential for  
50 continuous and high-acuity vision. However, if FEM are too large or too fast, the light intensity defining a  
51 visual stimulus will spread over a large population of cells each with an insufficient exposure to the  
52 stimulus, resulting in nothing but smeared, ghost-like impressions. Therefore, there must be an  
53 optimum movement between these two extremes whereby visual perception is maximized such that the  
54 ability to perform a visual task is highest at that particular movement.

55 Previous research showed that naturally occurring or artificially induced irregular and continuous retinal  
56 image drifts help in seeing fine spatial details (Ratnam, Harmening, & Roorda, 2017; Rucci et al., 2007).  
57 Likewise, naturally occurring microsaccades or sudden jumps of stimuli are known to counteract visual  
58 fading (Costela, McCamy, Macknik, Otero-Millan, & Martinez-Conde, 2013; Martinez-Conde, Otero-  
59 Millan, & Macknik, 2013), and help redirect our gaze to compensate for the non-homogeneous acuity  
60 within the fovea (Poletti, Listorti, & Rucci, 2013). If there is a causal relationship between FEM and visual  
61 perception, the latter should show a “tuning” function with different levels of the former, analogous to  
62 orientation tuning of cells in the early visual areas where firing rate of a given cell is continuously  
63 modulated by how close the orientation of a stimulus in its receptive field to its “preferred orientation.”  
64 In other words, direct manipulation of FEM, or the way retinal image moves as a function of FEM should  
65 result in systematic changes in visual perception, where maximum performance in a visual task would be  
66 obtained at the preferred or optimal FEM. From an evolutionary point of view, FEM in normal vision can  
67 be thought as optimally tuned for seeing fine details at the fovea. Here, we explicitly tested this  
68 hypothesis. Our results show that normal FEM are tuned, but not quite optimal, for fine discrimination  
69 at the fovea. We also found that within the range of spatial frequencies where the human visual system

70 has highest contrast sensitivity, this relationship disappears suggesting a higher tolerance for retinal  
71 image motion for coarse visual structures.

## 72 **Methods**

### 73 **Participants**

74 Seven human subjects (including the first author, S1) with normal or corrected-to-normal vision (20/20  
75 or better in each eye) participated in the study. All seven subjects took part in Experiment 1. Three of  
76 the seven subjects participated in Experiment 2. All subjects, except the first author, were naïve as to  
77 the purpose and the details of the experiments. All subjects gave written informed consent prior to the  
78 experiments. All experimental procedures followed the principles put forth by the Declaration of  
79 Helsinki, and were approved by the Institutional Review Board at the University of California, Berkeley.

### 80 **Apparatus**

81 For stimulus delivery and eye tracking, we used a custom-built tracking scanning laser ophthalmoscope  
82 (TSLO) (Sheehy et al., 2012). The TSLO has a diffraction-limited optical design, provides high-fidelity  
83 imaging of the retina, and more importantly, offers online tracking of eye movements. For the  
84 experiments presented here, we used a  $10 \times 10 \text{ deg}^2$  ( $512 \times 512 \text{ pixels}^2$ ) field of view (FOV), which  
85 yielded a pixel size of 1.17 arcmin. A large FOV enabled us to capture videos with rich retinal structure  
86 which, in turn, allowed accurate image-based eye tracking and stimulus delivery. The horizontal scanner  
87 operates at 16 kHz whereas the vertical scanner operates at 1/512 of this rate to record full frames at 30  
88 frames per sec. An 840 nm super luminescent diode with a 50 nm bandwidth was used to scan the  
89 retina. Visual stimuli were delivered by manipulating the laser beam via an acousto-optic modulator  
90 with the output controlled by a 14-bit digital to analog converter. Therefore, the stimuli had a negative  
91 contrast on the dim red raster created by the scanner (i.e., appeared black on a red background). Details  
92 of online eye movement tracking have been reported elsewhere (Arathorn et al., 2007; Mulligan, 1997;  
93 Yang, Arathorn, Tiruveedhula, Vogel, & Roorda, 2010). Briefly, each frame was broken into 32 horizontal  
94 strips ( $16 \times 512 \text{ pixel}^2$ ) and each strip was cross-correlated with a reference frame acquired earlier. The  
95 horizontal and vertical shifts required to match a strip to the reference frame represent a measure of  
96 the relative motion of the eye. This method results in an eye movement sampling rate of 960 Hz. These  
97 computations occur in near real-time (with  $2.5 \pm 0.5 \text{ ms}$  delay) and allows accurate stimulus delivery at  
98 specific retinal locations.

### 99 **Stimuli and Procedures**

100 The task was to report the orientation of a sinusoidal grating from vertical (2AFC, clockwise or  
101 counterclockwise). The amount of tilt was  $\pm 45^\circ$  from vertical and the spatial frequency of the grating  
102 was 12 cpd in Experiment 1 (**Fig. 1a**) and 3 cpd in Experiment 2. Prior to each experiment, the contrast of  
103 the grating was adjusted for each subject to yield  $\sim 80\%$  correct discrimination performance under the  
104 natural viewing condition (i.e., gain = 0). The size of the grating was  $3 \times 0.75 \text{ deg}^2$ . Horizontal edges were  
105 smoothed using a cosine profile. Mean luminance (as measured indirectly from laser power) of the  
106 grating was kept at  $\sim 70\%$  of the luminance of the scanning raster for all subjects, regardless of the  
107 contrast of the grating (**Fig. 1b**). All experiments were performed in a dark room, and subjects were dark  
108 adapted for about half an hour prior to any data collection. For some subjects (three out of seven), pupil  
109 of the imaged eye was dilated to maintain good retinal image quality throughout the session.

110 Each trial started with a fixation cross ( $0.2 \text{ deg}$ ) presented at the center of the raster. The experimenter  
111 manually acquired a reference frame for online tracking at the start of each trial. Following a random  
112 delay (up to 1 sec), the stimulus was presented for 900 ms (flickered at 30 Hz). Subjects responded via a

113 gamepad, had unlimited time to respond, and could have a break at any point during a block of trials.  
114 The set of gains used were -1, -0.5, 0, 0.5, 1, 1.5, and 2. Different gains were interleaved within a block  
115 of trials. All observers completed at least 100 trials per gain. Right after the completion of the main  
116 experiment and before data analyses, subject S4 was tested for a second run in Experiment 1 since her  
117 retinal image quality and head stability during the experiment was poor, causing retinal stabilization to  
118 fail in many of her trials. In the second run, we used finer steps of gain (from -0.25 to 1.25 in steps of  
119 0.125) and subject S4 again ran at least 100 trials per gain. However, all results presented in the main  
120 text include only the data from the first run for S4. The results from both runs for S4 are shown in **Fig. 3**.

## 121 **Retinal video analysis**

122 Retinal videos were analyzed offline for five main reasons. First, we sought to determine how well and  
123 where the stimulus was delivered on a trial-by-trial basis. Second, online eye tracking was performed by  
124 using raw retinal images which were corrupted by high frequency noise and low frequency luminance  
125 gradients. In order to get more accurate eye motion estimates relatively less dependent on changes in  
126 overall brightness and uniformity of retinal images across trials, one needs to perform several pre-  
127 processing steps on retinal images. To this end, we performed the following image processing steps  
128 before computing eye motion. Trimming, detection and removal of frames during which subjects  
129 blinked, extracting stimulus position and removal of the stimulus (replaced by random noise patterns  
130 whose statistics –mean and standard deviation, matched to the rest of the frame), gamma correction,  
131 bandpass filtering (for removal of high frequency noise and low frequency brightness gradients), and  
132 making a reference frame. Third, during online eye tracking, if the peak of normalized cross-correlation  
133 between a strip and the reference frame was below 0.3, possibly due to (i) bad image quality, (ii)  
134 excessive distortion of image features due to a rapid eye movement, (iii) insufficient amount of overlap  
135 between the strip and the reference frame due to large eye motion, or (iv) blinks, the stimulus was not  
136 delivered. By offline processing of retinal videos, we also sought to inspect each and every frame of  
137 retinal videos and discard the trials if the stimuli was delivered inaccurately or was not delivered at all in  
138 more than two frames per trial (note that with this criterion, trials where subjects blinked were also  
139 discarded). This procedure resulted in removal of 28.8% (1305/4525) and 8.7% (206/2353) of all trials in  
140 Experiment 1 and 2, respectively. Fourth, since the reference frames used for online tracking were  
141 basically snapshots of the retina taken manually by the experimenter, and since the eyes are almost  
142 never stationary, the reference frames themselves might have some distortions due to these motions.  
143 By offline processing, we created a relatively motion-free reference frame for each and every trial  
144 separately in an iterative process. This process started by selecting one of the frames in a retinal video  
145 as the reference frame, and computing eye motion. After each iteration, a new reference frame was  
146 built by using computed eye motion and individual strips. We performed three iterations for each video,  
147 and the reference frames made in the last iteration were used for the final computation of eye motion.  
148 The strip height and sampling rate used for the final strip analysis were 25 pixels and 540 Hz,  
149 respectively. Fifth, during offline analysis, we could interpolate the cross-correlation maps around where  
150 the peak occurs to achieve subpixel resolution (one tenth of a pixel, 0.12 arcmin) in computing eye  
151 motion.

## 152 **Post-processing**

153 Following strip analysis of individual videos, the computed eye motion traces were subjected to several  
154 post-processing steps. First, eye motion traces were “re-referenced” to a larger reference frame created  
155 by retinal videos recorded in a separate session where subjects were asked to fixate at different position  
156 on the scanning raster. This essentially allowed us to capture images from different part of the retina  
157 and tile them on a larger (“global”) reference frame. Re-referencing was needed since each and every  
158 video had a slightly different (“local”) reference frame (since reference frames were created for each

159 video separately), and hence, the absolute values of the eye motion would differ across trials. This step  
160 is required also for computing the absolute retinal position of the stimulus across all trials for a given  
161 subject. Re-referencing was performed by adding a constant shift to the previously computed eye  
162 motion traces, where the amount of shift was defined as the position of the local reference frame on  
163 the global one. After re-referencing, eye motions were then converted to visual degrees, low-pass  
164 filtered (passband and stopband frequencies of 80 and 120 Hz, respectively, with 65 dB attenuation in  
165 the stopband), and median filtered (with a window of 9 samples, ~17 ms) to reduce frame-rate artifacts  
166 (30 Hz noise and its harmonics). Filtered traces were used to compute retinal motion of the stimulus  
167 (defined as the difference between stimulus motion and eye motion). We quantified the amount of eye  
168 and retinal motion on a trial-by-trial basis as the 68% isoline area (Caset & Crossland, 2012) (referred to  
169 as ISOA in the main text), which corresponds to the area of the 0.68 cumulative probability isoline (**Fig.**  
170 **1d**). This also roughly corresponds to the area covered by 68% percent of the motion samples. In the  
171 case of retinal motion, this metric quantifies the retinal area traversed by the stimulus in a given trial,  
172 and for eye motion, it represents the area of the raster (in world centered coordinates) over which the  
173 eye moved. The distribution of the ratio of retinal ISOA and eye ISOA reveals how well the stimulus was  
174 delivered in different conditions (see Fig. X). The theoretical ratio for a given gain is defined as

$$\frac{ISOA_{ret}}{ISOA_{eye}} = \text{sgn}(1 - g)(1 - g)^2,$$

175 where  $g$  represents gain, and  $\text{sgn}(\cdot)$  represents the signum function which was introduced to  
176 differentiate between gains that result in the same retinal motion magnitude but in opposite directions  
177 (**Fig. 1f**, and **Fig. 3c**).

178 We also computed the preferred retinal locus (PRL) of the stimulus for each trial. PRL was defined as the  
179 retinal location corresponding to the highest probability density of stimulus presence. The probability  
180 densities were computed by the “kernel density estimation via diffusion” method (Botev, Grotowski, &  
181 Kroese, 2010) with a slight modification. More specifically, the kernel bandwidth was set to one-sixth of  
182 the standard deviation of the eye (or retinal) motion (as in Kwon, Nandy, & Tjan, 2013). The median PRL  
183 in the trials where the gain was 0 (i.e., natural viewing) was taken as the location of the fovea and trial-  
184 to-trial PRL eccentricity was calculated with respect to this quantity. Finally, we identified microsaccades  
185 by using a median-based velocity threshold (Engbert & Kliegl, 2003). Eye motion traces from all trials  
186 were visually inspected to ensure that microsaccade detection was performed correctly.

187 The PRL estimated when gain is 0 reflects the true PRL. Since PRL is mostly determined by the position of  
188 the stimulus at the beginning of a trial (e.g., when gain is 1, the stimulus will stay at the start position),  
189 the estimated PRLs in other gain conditions do not necessarily reflect the preferences of the subjects.  
190 However, they demonstrate the idiosyncratic eye movements which govern the starting position of the  
191 stimulus. Nevertheless, to keep a consistent nomenclature, we used the term PRL across all conditions.

## 192 **Statistics**

193 In order to test the tuning and no tuning hypotheses, we fit performance with a flat line and a quadratic  
194 polynomial (as well as a Gaussian, although polynomial and Gaussian fits produced almost identical  
195 results), and compared the adjusted  $R^2$  values as a metric of goodness of fit.

196 Due to foveal presentation of the stimuli, different gains led to different idiosyncratic oculomotor  
197 behaviors which could not be controlled during the experiments. We quantified several covarying  
198 factors such as retinal ISOA, eye ISOA, PRL eccentricity, and microsaccade rate. The exact choice of  
199 covarying factors was driven by the need to account for main retinal and eye movement-related metrics.  
200 It is possible to estimate retinal image velocity, acceleration, or components of retinal image motion

201 parallel or perpendicular to the orientation of the gratings. It is also possible to quantify these metrics in  
202 multiple ways, such as by their mean, standard deviation, minimum, maximum, or any combination of  
203 these together. However, since most of these metrics are strongly related to each other, adding  
204 different variants of them does not add much explanatory power. In addition, eye position traces  
205 extracted from retinal videos tend to have frame-rate artifacts, i.e., more power than normal at  
206 temporal frequencies around the frame rate of the videos. The frame-rate artifact gets amplified for  
207 velocity and acceleration due to differentiation, and more importantly, the severity of the effect  
208 interacts with different gain conditions (due to changes in oculomotor behavior). Position estimates are  
209 not influenced as much and indirectly captures the effect of its derivatives.

210 In order to determine how much of the effect of gain on performance is mediated by the  
211 aforementioned covarying factors, we performed a linear-mixed effects regression-based mediation  
212 analysis (MacKinnon, Fairchild, & Fritz, 2007). We followed the commonly-used four-step approach  
213 suggested by Baron and Kenny (Baron & Kenny, 1986). The aim of this analysis was to determine  
214 whether or not gain had a significant direct effect on discrimination performance, even after taking into  
215 account the effects of mediators (i.e., significant covarying factors). Mediation analysis can be done in  
216 many ways depending on the causal relationship between the independent variable and mediators.  
217 When there are multiple mediators, say  $n$ , there are  $2^{(n)}$  possible ways of decomposing total effect size.  
218 In our case,  $n=4$ , this yields 16,777,216 possibilities (Daniel, De Stavola, Cousens, & Vansteelandt, 2015).  
219 Since finding the best way of organizing mediators to account for data is beyond the scope of the  
220 present work, we chose a simple case where all mediators were treated as independent factors that are  
221 directly modulated by only the independent variable, the gain, and they did not have interactions  
222 among each other nor with the gain. However, they were allowed to covary with subjects, and each had  
223 a fixed slope and a random intercept to account for individual differences in mediator values.

## 224 Results

225 Using a tracking scanning laser ophthalmoscope (TSLO) (Sheehy et al., 2012), we presented seven  
226 human subjects with a high spatial frequency grating (12 cpd) for 900 ms while imaging their retina and  
227 tracking their eye movements in real time (**Fig. 1a, b**). We systematically manipulated the way retinal  
228 image motion and the actual FEM are related. The motion of the stimulus on the scanning raster was a  
229 function of the estimated eye motion times a *gain* factor (**Fig. 1d**). A gain of 0 means that the stimulus  
230 position remained fixed relative to the raster but slipped across the retina based on natural FEM. A gain  
231 of 1 means that the stimulus was stabilized on the retina, i.e., the retinal image motion due to FEM was  
232 completely cancelled out. A gain of 0.5 refers to partial stabilization, i.e., the stimulus moved only half as  
233 much as the eye motion. Assuming similar oculomotor behavior under different gains, a gain of -1  
234 doubles the retinal slip of the stimulus compared to that under natural viewing (i.e., gain = 0), and a gain  
235 of 2 results in the same retinal slip but in the opposite direction of what would occur under natural  
236 viewing. Offline analyses of retinal videos for eye movement extraction revealed that eye tracking and  
237 stimulus delivery were performed with near-perfect accuracy (~99%) for complete retinal stabilization  
238 (gain = 1). For gain conditions other than 0 and 1, there was some trial-to-trial variability in accuracy of  
239 stimulus delivery (**Fig. 1e, f**). Nevertheless, each gain condition resulted in a statistically distinct  
240 distribution of effective gains centered at the desired gain (**Fig. 1e, f**). We measured subjects' ability to  
241 discriminate the direction of the grating's orientation from vertical under different gain conditions. If  
242 FEM are not tuned for fine discrimination at the fovea, then performance should not depend on gain  
243 (the null hypothesis, **Fig. 1c**). On the other hand, if the retinal image motion due to FEM is tightly tuned  
244 for fine discrimination, performance should manifest a non-monotonic relationship with gain, where a  
245 particular value of gain results in the best (or worst) performance (**Fig. 1c**). The tuning hypothesis can  
246 hold true in various ways. If FEM are optimal for fine discrimination at the fovea, then visual

247 performance should peak at the gain of 0. Alternatively, retinal image motion might be the primary  
 248 determinant of visual performance. If retinal image motion is always detrimental for seeing, visual  
 249 performance should be highest at the gain of 1. Retinal motion might also be beneficial regardless of the  
 250 underlying FEM. If that is the case, the lowest discrimination performance should occur when the  
 251 stimulus is fully stabilized on the retina.

252

253

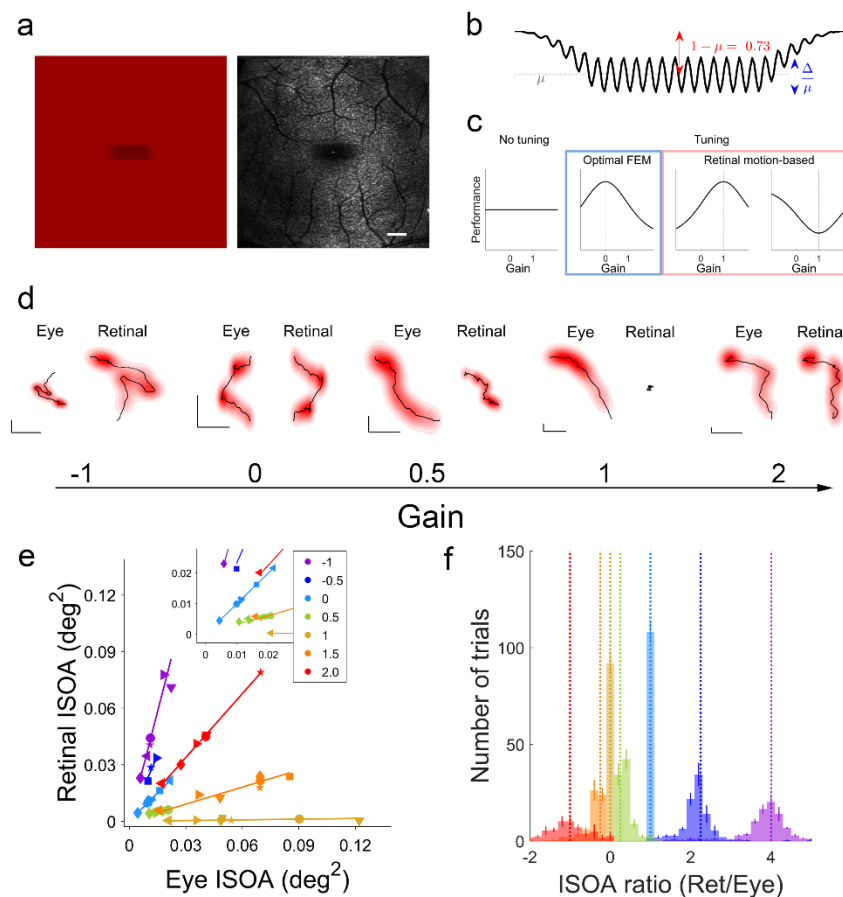

254

255 **Figure 1** Manipulating the relationship between retinal image motion and eye motion with the TSLO. **(a)**  
 256 An orientation discrimination task at the fovea. Subjects' view of a grating on the raster (left), and  
 257 corresponding retinal image (right). Note that the stimulus is imprinted on the retinal image. **(b)** The  
 258 luminance profile used to create grating patterns on the raster. The mean luminance of the grating was  
 259 set to  $\sim 70\%$  of the background and the contrast of grating was adjusted for each subject. **(c)** Predictions  
 260 from the no tuning (null) and tuning hypotheses. The panels with blue and red outlines show various  
 261 ways tuning can occur. **(d)** Sample eye motion and retinal image motion traces (black lines) and  
 262 corresponding probability densities (red clouds) for different gains. The horizontal and vertical lines in the  
 263 lower left corner of each panel represent  $0.1^\circ$ . Dimensions were adjusted for clarity. **(e)** Retinal ISOA as a  
 264 function of eye ISOA across gains in Experiment 1. Different colors represent different gains, and subjects  
 265 are coded by different symbols. Inset shows a close-up view of data for smallest retinal/eye motion. **(f)**  
 266 The distribution of retinal/eye ISOA ratios for different gains, averaged across seven subjects. Vertical  
 267 dotted lines show theoretical ISOA ratios, i.e., assuming that eye tracking, stimulus delivery, and offline

268 eye movement extraction were perfect. Error bars represent  $\pm$ SEM ( $n=7$ ). Color conventions for gains are  
 269 identical across all figures.

270

271

272

273 We found that orientation discrimination performance is tuned to gain (Fig. 2a, b). Averaged across  
 274 subjects, the peak performance occurred at a gain of 0.43 (95% confidence intervals: 0.12, 0.74),  
 275 suggesting that partially reducing the effects of FEM is actually helpful in seeing fine spatial details.  
 276 Results were similar when data from each subject were fitted separately (polynomial:  $t_6=3.165$ ,  $p=0.019$ ;  
 277 Gaussian:  $t_6=2.600$ ,  $p=0.041$ ) (Fig. 2b and Fig. 3). The exact choice of the tuning model (a quadratic  
 278 polynomial or a Gaussian) did not matter (paired t-test:  $t_{12}=3.165$ ,  $p=0.019$ ). Bootstrapping tuning curve  
 279 fits to binary data (correct vs incorrect) also revealed no optimality in six of the seven subjects (Fig. 3).  
 280 These results suggest that FEM are tuned but not optimal for fine discrimination at the fovea, at least  
 281 within the range of parameters investigated here.

282

283

284

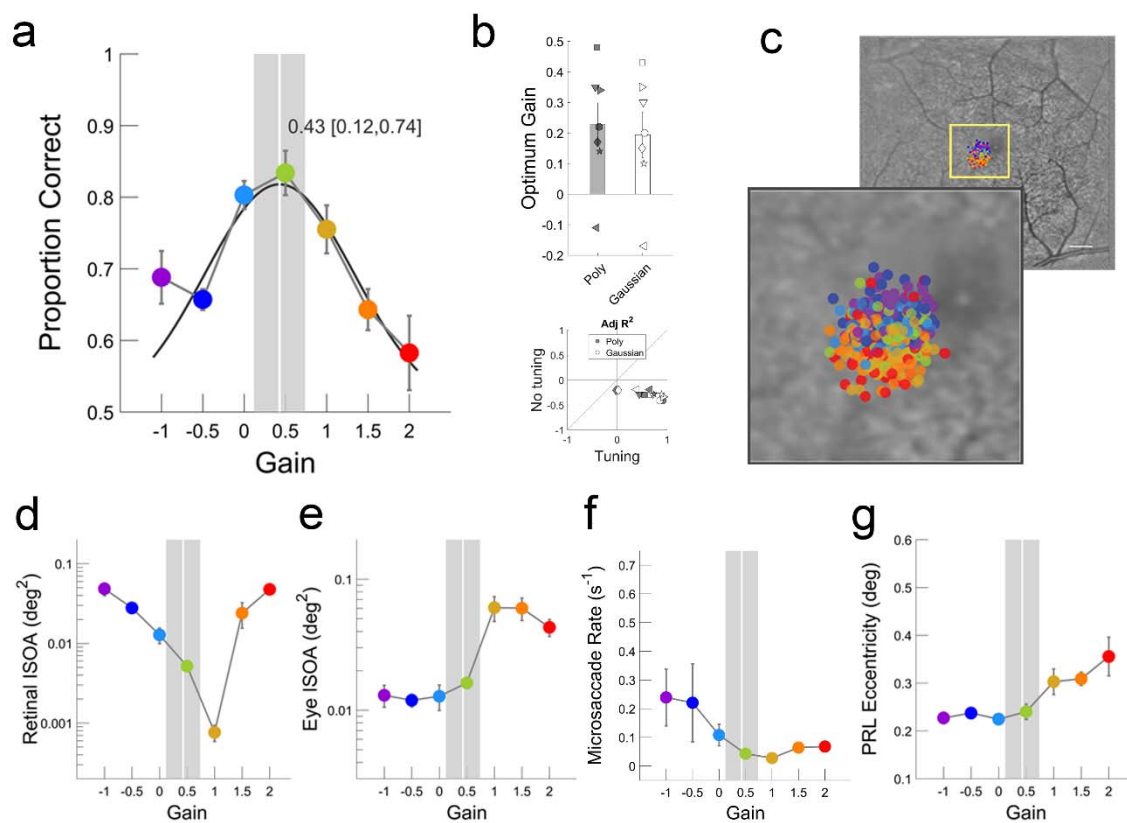

285

286 **Figure 2** FEM are tuned, but not optimal, for fine discrimination at the fovea. (a) Proportion correct as a  
 287 function of gain, averaged across subjects, in Experiment 1. A Gaussian tuning function was fit to all data



288 (black curve) to estimate the optimum gain. Vertical white line represents optimal gain defined as the  
 289 gain corresponding to the peak of the Gaussian. Shaded regions represent 95% confidence intervals of  
 290 the optimum gain. **(b)** (Top) Average optimal gains based on individual tuning function fits along with  
 291 individual optimal gains. A quadratic polynomial and a Gaussian tuning function resulted in statistically  
 292 indistinguishable optimal gains. (Bottom) To compare the “no tuning” and “tuning” hypotheses in terms  
 293 of how well they can explain our data, we computed Adjusted  $R^2$  metric for the constant model and  
 294 tuning models (a quadratic polynomial or a Gaussian), respectively. For all subjects, tuning models  
 295 performed better. **(c)** (Top-right) the distribution of preferred retinal locus (PRL) across trials for one  
 296 representative subject. Each symbol represents one trial. (Bottom-left) A close-up view of the central  
 297  $\sim 2.5^\circ$  part of the retina. Note the systematic change in PRLs across gains. **(d, e)** Retinal image motion  
 298 and eye motion ISOA as a function of gain. **(f, g)** Microsaccade rates and PRL eccentricity across gains.  
 299 Optimal gain and confidence intervals in (a) are replotted in (d, e, f, and g). Error bars represent  $\pm$ SEM  
 300 ( $n=7$ ).

301

302

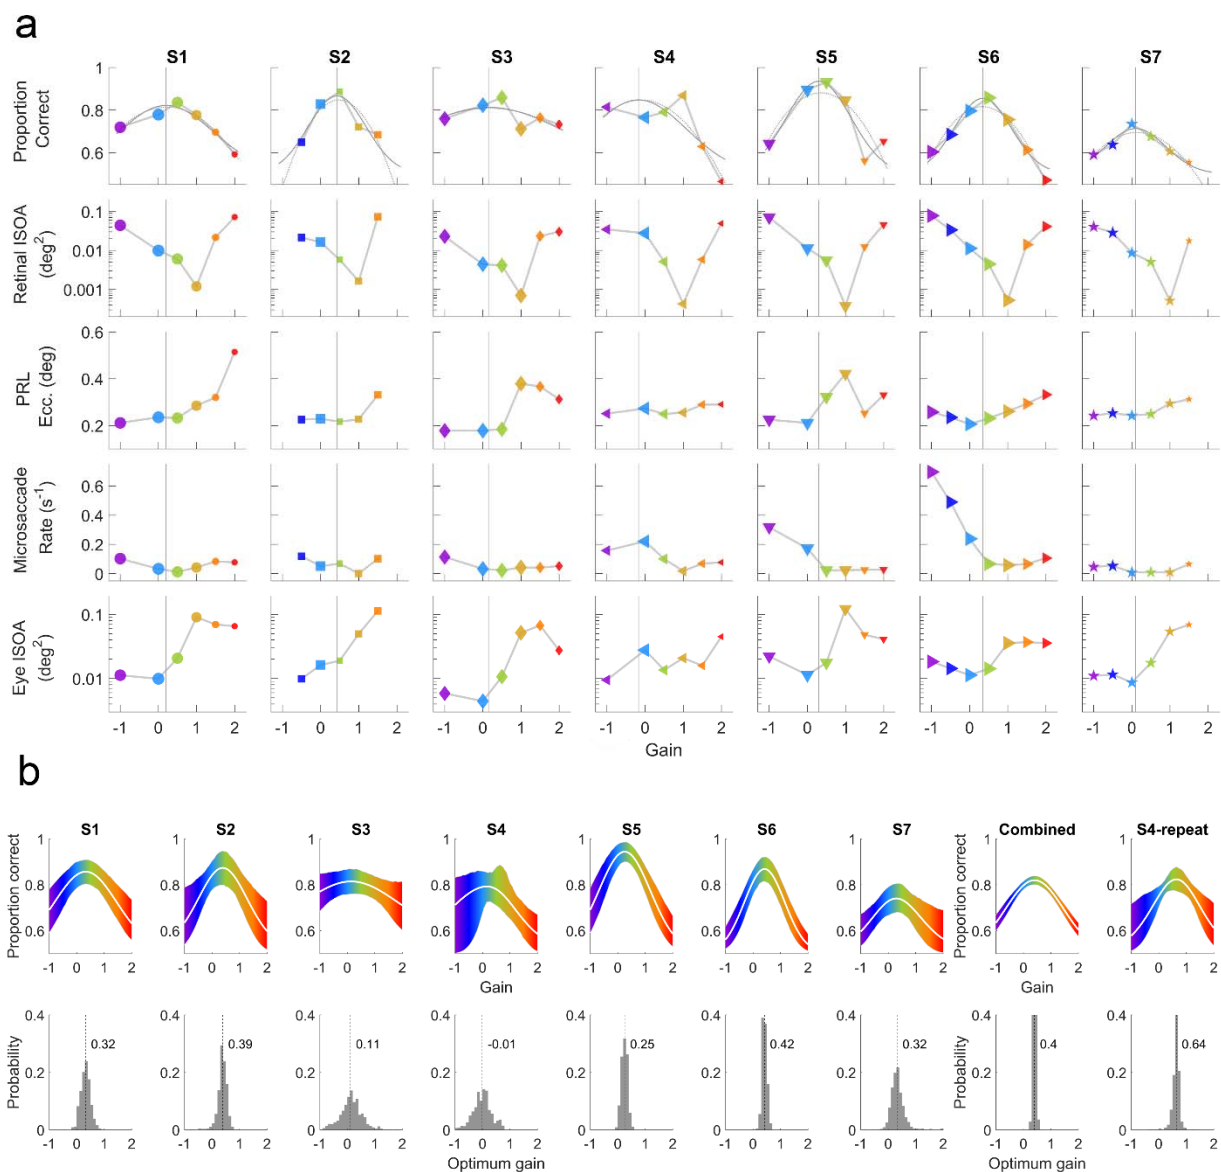

303 **Figure 3** Individual results from Experiment 1. **(a)** Proportion correct and all mediators quantified in the  
 304 present study, binned based on gain. **(b)** Bootstrapping tuning curve fits (top) and optimal gains (bottom)  
 305 for each subject by using binary data (correct vs incorrect). White lines represent the fits corresponding  
 306 to median parameters. Shaded regions (top) represent 2.5-97.5% percentiles of the bootstrapped  
 307 distributions of fitted curves. For each panel, bootstrapping was done by resampling the individual trial  
 308 data with replacement 1000 times. Vertical dashed lines (bottom) represents the median optimal gains.  
 309 The data from second run of S4 were combined with the first run and analyzed together, and are shown  
 310 here in the rightmost panels. The vertical axes in bottom panels in **(b)** are cropped to 0.4 for better  
 311 visibility.

312

313 In order to check whether or not the tuning between performance and gain is limited only to fine  
 314 discrimination tasks, we repeated the experiment with a spatial frequency (3 cpd) at which the human  
 315 visual system has highest contrast sensitivity for static displays (Kelly, 1977). The hypothesis was that the  
 316 retinal jitter due to FEM causes much less modulations in retinal ganglion cells with low spatial  
 317 frequency stimuli, therefore, gain manipulations should result in minimal or no change in performance.  
 318 We found no effect of gain on performance (**Fig. 4a**), despite the retinal image motion varied over two  
 319 log units across conditions (**Fig. 4d**). Different performance trends with gain in Experiments 1 and 2  
 320 cannot be explained by differences in retinal motion, eye motion, microsaccade rate, or PRL eccentricity  
 321 (**Fig. 2d-g** vs **Fig. 4d-g**).

322

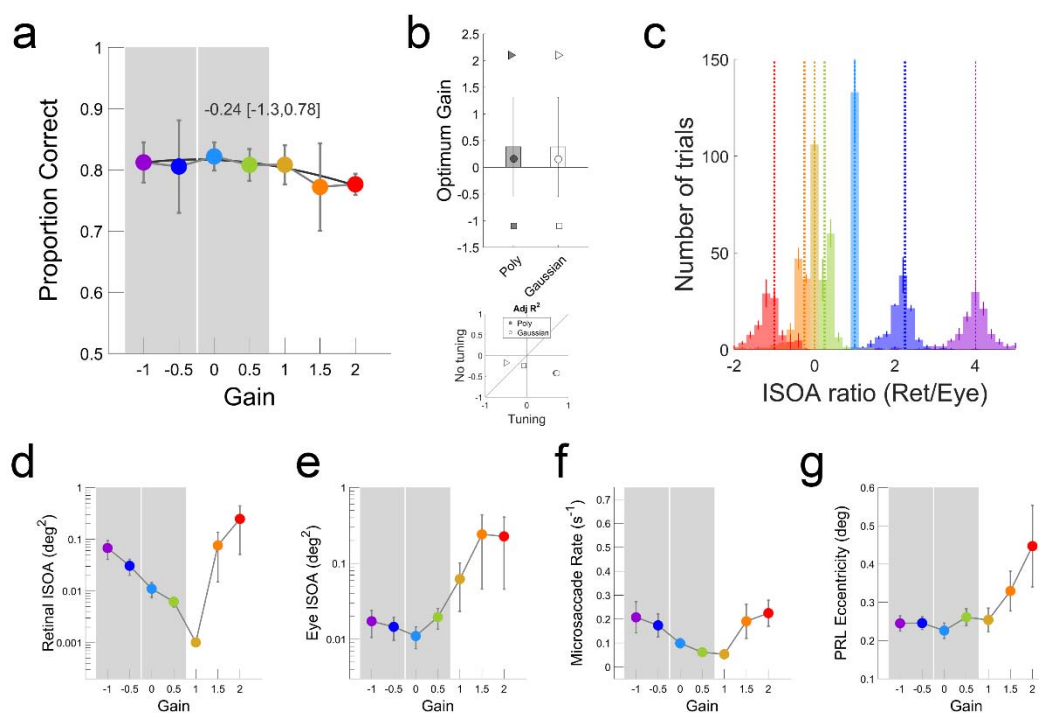

323

324 **Figure 4** FEM are not tuned for coarse discrimination at the fovea. **(a)** Proportion correct as a function of  
 325 gain in Experiment 2. **(b)** Average optimal gains based on individual tuning function fits along with  
 326 individual optimal gains. **(c)** The distribution of retinal/eye motion ISOA in Experiment 2. **(d, e)** Retinal  
 327 image motion and eye motion ISOA as a function of gain. **(f, g)** Microsaccade rates and PRL eccentricity

328 *across gains. Optimal gain and confidence intervals in (a) are replotted in (d, e, f, and g). Error bars*  
329 *represent  $\pm$ SEM ( $n=7$ ). Conventions are as in **Figure 2**.*

330

331 Next, we sought to determine what drives the strong dependency between performance and gain with  
332 high spatial frequency gratings. If gain manipulation only modulates the retinal image motion, then the  
333 answer would simply be retinal image motion, assuming no interference from extra-retinal mechanisms.  
334 The approach taken in most retinal stabilization studies in the literature implicitly assumes that gain  
335 manipulation only results in changes in retinal image motion. In other words, retinal image motion is  
336 considered as the one and only mediator of performance. However, we found that gain modulates  
337 multiple mediators. We computed two-dimensional probability density of stimulus locations on the  
338 retina and eye positions on the raster (e.g., **Fig. 2d**), and quantified, on a trial-by-trial basis, the extent of  
339 retinal image motion and eye motion by the isoline area (ISOA) containing roughly 68% of the  
340 retinal/eye motion traces (**Fig. 2d, e** and **Fig. 3**). As expected, the minimum retinal ISOA occurred when  
341 the stimulus was stabilized on the retina (i.e., gain = 1) but the pattern of changes in retinal ISOA as a  
342 function of gain revealed an asymmetric “V” shape around the gain of 1 (**Fig. 2d**). This asymmetry can be  
343 explained by differences in oculomotor behavior of subjects across different gains. More specifically,  
344 consistent with previous literature (Poletti, Listorti, & Rucci, 2010), subjects made smooth pursuit-like  
345 eye movements for gains of 1 and larger, which resulted in larger eye ISOAs (**Fig. 2e**). This change in  
346 behavior occurred as soon as the retinal slip is no longer in a direction that is consistent with eye  
347 motion, in line with recent perceptual observations (Arathorn, Stevenson, Yang, Tiruveedhula, & Roorda,  
348 2013). In addition, subjects made slightly more microsaccades for negative gains where retinal image  
349 motion is amplified (**Fig. 2f** and **Fig. 3**). In addition, although each trial started with a fixation cross at the  
350 center of the raster, the preferred retinal locus (PRL) during grating presentation, defined here as the  
351 retinal location corresponding to peak probability density of retinal stimulus locations, also changed  
352 with gain (**Fig. 2c, f, g** and **Fig. 3**). To determine what really drives the relationship between gain and  
353 performance, one must take these mediators into account. In a regression-based mediation analysis  
354 following the most commonly used four-step approach (Baron & Kenny, 1986), we found that (i) gain  
355 has a significant effect on performance, (ii) gain significantly modulated all four mediators (retinal ISOA,  
356 eye ISOA, microsaccade rate, and PRL eccentricity), (iii) all mediators individually, with the exception of  
357 microsaccade rate, are significant predictors of performance, (iv) gain remains a significant predictor of  
358 performance even when the effects of all significant mediators are taken into account (**Fig. 5**). In order  
359 to determine whether or not mediators can account for the data as well as gain by itself, we performed  
360 a series of linear-mixed effects regression analyses (**Fig. 6**). In terms of explained variance and log-  
361 likelihood, where number of factors is not penalized, several purely mediator-based models could  
362 surpass the models based on gain only, suggesting that mediators identified here might fully account for  
363 how gain modulates performance. However, as the Bayes Information Criterion (BIC) differences show,  
364 none of the mediator-based models could outperform the simple model that is based only on gain.  
365 Through additional regression analyses and model comparisons using BIC, we confirmed that  
366 performance cannot be fully accounted by mediators alone (**Fig. 6**).

367

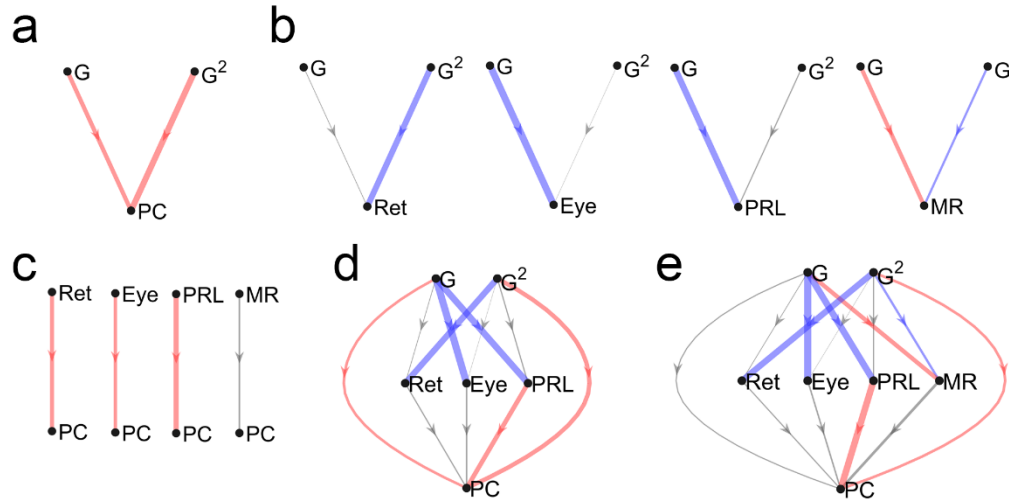

368

369 **Figure 5** Teasing apart contributions of different mediators. **(a)** The first step in mediation analysis is to  
 370 establish a significant relationship between gain ( $G$ ) and proportion correct ( $PC$ ). Since the tuning  
 371 hypothesis predicts a quadratic relationship between  $G$  and  $PC$ , we included the  $G^2$  in our regression  
 372 analyses. **(b)** Second, whether or not gain is a significant predictor of each covarying factor ( $Ret$ : retinal  
 373 ISOA,  $Eye$ : eye ISOA,  $PRL$ : PRL eccentricity,  $MR$ : microsaccade rate) is established. **(c)** The third step tests  
 374 separately for a significant effect each mediator on performance. **(d)** Finally, gain and mediators with a  
 375 significant correlation on performance are used to explain performance. Red and blue colors represent  
 376 statistically significant negative and positive effects whereas gray lines represent insignificant  
 377 relationships. The final model in **(d)** shows that even when all significant mediators are taken into  
 378 account, gain still has a significant effect on performance. **(e)** When all mediators are included,  
 379 regardless of the outcome of **(c)**, gain remains to be a significant factor. Thickness of each line represents  
 380 the absolute value of the standardized effect size.

381

382

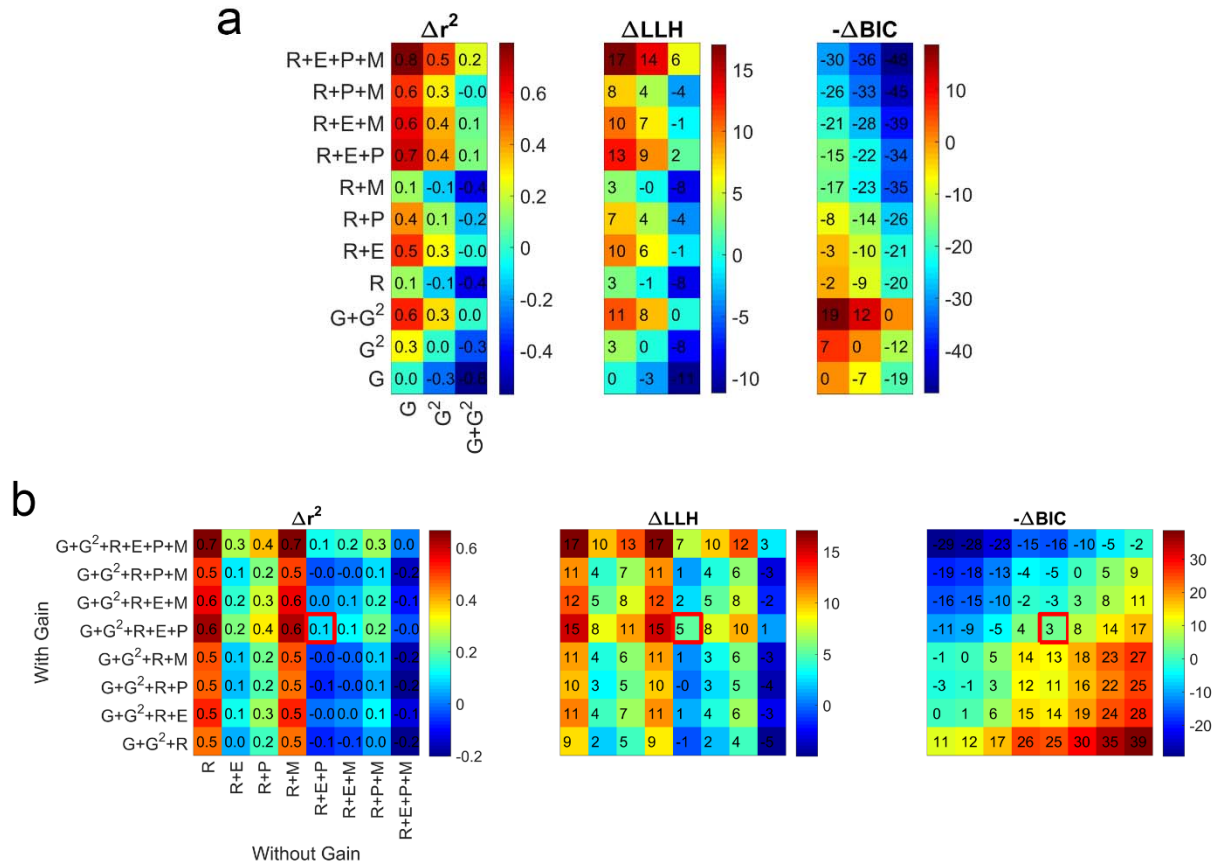

383

384 **Figure 6** Contributions of gain and mediators in explaining variance. **(a)** Change in (left) explained  
 385 variance, (middle) log-likelihood, and (right) BIC with addition of mediators. Note that the sign of  $\Delta BIC$  is  
 386 flipped so that red color represents superiority of a model on the vertical axis with respect to another one  
 387 on the horizontal axis. G: Gain, R: retinal ISOA, E: eye ISOA, P: PRL eccentricity, M: microsaccade rate. **(b)**  
 388 Can mediators fully account for the effects of gain? Here, we explicitly tested whether having gain in  
 389 addition to mediators improve statistical models substantially. The right diagonal in each panel  
 390 represents the exact contribution of the gain term. The red squares represent the final model in the  
 391 mediation analysis ( $G+G^2+R+E+P$ ) (**Fig. 5d**). In general, adding gain was helpful only when there are three  
 392 or less mediators in the regression model.

393

394

## 395 Discussion

396 “Tuning” refers to a relationship between an independent variable and an outcome measure, where a  
 397 certain level of the former is more preferable than others. Optimality in this context refers to achieving  
 398 the best possible outcome in the face of several antagonist factors. Throughout the vast literature on  
 399 FEM and visual perception, the word “optimal” has been used quite liberally in regard to spatiotemporal  
 400 properties of FEM (Ahissar & Arieli, 2012; Cornsweet, 1956; Ditchburn, Fender, & Mayne, 1959; Gerrits  
 401 & Vendrik, 1970; Kuang, Poletti, Victor, & Rucci, 2012; Martinez-Conde et al., 2004; Skavenski, Hansen,  
 402 Steinman, & Winterson, 1979) although there has never been an explicit test for addressing it. Here, we  
 403 tested whether visual performance in a fine orientation discrimination task would show tuning as a

404 function of the relationship between the retinal image motion and actual eye movements. We found  
405 strong tuning for a fine-detail discrimination task (Experiment 1) but not for a coarse discrimination task  
406 (Experiment 2). The absence of tuning in Experiment 2, despite up to a two log-unit change in retinal  
407 motion across conditions, suggests a very high tolerance for motion. Surprisingly, the optimal gain in  
408 Experiment 1 was obtained at a gain value between 0 and 1, suggesting that partially compensating for  
409 FEM can be beneficial.

410 Our results might seem inconsistent with previous reports where complete retinal stabilization resulted  
411 in impaired discrimination performance (Ratnam et al., 2017; Rucci et al., 2007). A simple interpolation  
412 between the two extremes suggests a monotonic impairment in visual performance with better  
413 compensation for FEM. This apparent inconsistency may not be real. First, it is technically possible to get  
414 impaired performance with complete stabilization *and* a nonzero optimal gain at the same time (which  
415 was the case for five out of seven subjects, **Fig. 3**). Second, none of the existing studies explored the  
416 range of gains used here for discrimination tasks at the fovea. In addition, in previous studies, fading  
417 that resulted from retinal stabilization was quantified by threshold elevations, but the degree to which  
418 fading occurs depends on many variables such as stimulus duration, size, contrast, eccentricity,  
419 equipment used, etc. (Coppola & Purves, 1996; Kelly, 1979a, 1979b; Riggs et al., 1953; Riggs & Tulunay,  
420 1959). Early studies on retinal stabilization used small stimuli extending only a few arcmin, and was  
421 closely surrounded by other visual cues coming from the apparatus (Ditchburn & Ginsborg, 1953; Riggs  
422 et al., 1953; Yarbus, 1967). More recent studies used foveally presented gratings extending several  
423 degrees of visual angle far from display boundaries (Poletti et al., 2013; Rucci et al., 2007), or  
424 parafoveally presented diffraction-limited stimuli covering only a few cones within a visible raster  
425 covering 1-1.3 deg (Ratnam et al., 2017). The paradigm used here was somewhere in between; we  
426 presented through natural optics of the eye a grating that covers the fovea and is situated within a  
427 visible raster covering 10 deg. Therefore, it is possible to make qualitative comparisons across  
428 aforementioned studies, however, it is not feasible to extrapolate previous studies to the conditions  
429 investigated here.

430 Our results are highly consistent with recent theoretical work that has been successfully used to account  
431 for performance impairment due to retinal stabilization (Anderson, Olshausen, Ratnam, & Roorda, 2017;  
432 Burak et al., 2010; Pitkow, Sompolinsky, & Meister, 2007). According to this framework, there are two  
433 distinct mechanisms that work in tandem, one for estimating FEM from RGC responses across the retina  
434 which negates the need for an extra-retinal mechanism to properly decode spatial information, and  
435 another one for making an *optimal* inference about the spatial layout of the stimuli. The presence of a  
436 global motion compensation mechanism for FEM was demonstrated by a striking visual illusion  
437 (Murakami & Cavanagh, 1998). Surprisingly, when receptive field size and density across the retina and  
438 the statistics of FEM under normal viewing conditions are factored in, this model predicted that normal  
439 human FEM are not optimal for high acuity tasks (Burak et al., 2010; Pitkow et al., 2007). This theory  
440 also predicts that larger stimulus sizes and peripheral cues would improve discrimination at the fovea  
441 since estimating FEM would be easier and more accurate in these conditions. It is possible that the  
442 absence of optimality might have arisen since the scanning raster was always visible in the present work.  
443 Although several lines of evidence against this prediction have been presented (Wehrhahn, 2011), they  
444 turned out to be lacking technical precision and proper controls to directly test this prediction (Burak,  
445 Rokni, Meister, & Sompolinsky, 2011).

## 446 **Covarying factors**

447 We have identified several mediator factors that could explain a significant portion of the variability in  
448 the data. Note that the presence of these mediators is not due to the equipment used or stimulus  
449 parameters, but reflects the inevitable consequence of foveal presentation of the stimuli. None of these

450 mediators have been reported quantitatively or used to account for data in the previous literature about  
451 the roles of FEM. Parafoveal (or peripheral) presentation of stabilized stimuli may not activate all of the  
452 aforementioned mediators (e.g., eye ISOA), however, non-foveal presentation of stimuli would defeat  
453 the purpose of this study since one cannot make strong inferences about foveal viewing with  
454 peripherally presented stimuli. Alternatively, an experiment where stimulus moves in an incongruent  
455 manner to avoid chasing can be performed, however, it is unclear whether or not small amplitudes of  
456 stimulus motion would still lead to pursuit-like eye movements. The way we chose to address what  
457 factors underlie the tuning between performance and gain reported here is to perform a mediation  
458 analysis (MacKinnon et al., 2007). This analysis showed that even when retinal motion, eye motion, PRL  
459 eccentricity, and microsaccade rate were factored in, gain still had a significant direct effect on  
460 performance. This finding suggests that (i) there are additional mediators not considered here, or (ii)  
461 “post-retinal” factors such as changes in attentional engagement in the task depending on gain value  
462 might be at play.

463 In order to assign extra-retinal factors a role for perception during FEM, one needs to factor out all  
464 possible retinal factors such as retinal ISOA, velocity, acceleration, PRL eccentricity, initial retinal  
465 position of the stimuli, etc. Obviously, these factors are not independent from each other, limiting the  
466 use of mediation analysis described here. Admittedly, the optimal gain might also be affected by these  
467 mediators. A way to compensate for their effects for the purpose of estimating optimal gain might be  
468 normalizing performance by each mediator and then testing for tuning. However, this exacerbates the  
469 problem since (i) whether a covarying factor is a positive mediator (reducing the effect) or a negative  
470 one (increasing the effect) is not known a priori, (ii) the relative contribution of each mediator is  
471 different but normalization assumes equal contribution, and (iii) each mediator has a different scale of  
472 change across conditions, which could result in numerical instabilities and prevent accurate  
473 determination of the optimal gain. Point (iii) can be addressed by log-transforming some mediators (e.g.,  
474 retinal ISOA) and/or standardizing them, and point (i) can be addressed by using the outcome of a  
475 mediation analysis to guide the normalization process, but point (ii) cannot be readily addressed. On the  
476 other hand, since visual performance comes about via mediators, there may not be a need for  
477 normalizing performance before computing optimal gains. From this perspective, they are not just  
478 artifacts to be removed, but the actual underlying factors of visual function. The logic is that whatever  
479 the exact value of optimal gain is, visual performance results from an interplay between various  
480 mediators, and it may not be possible to uniformly sample the multidimensional space defined by  
481 multiple mediators. A case in point, it seems that foveal presentation of a stimulus almost always leads  
482 to smooth pursuit-like oculomotor behaviors when the retinal projection of it is stabilized (Poletti et al.,  
483 2010).

## 484 **Microsaccades**

485 Human retina is non-homogeneous, even within the fovea. Therefore, making microsaccades to redirect  
486 gaze to enjoy the highest acuity part of the retina is a reasonable strategy (Cornsweet, 1956; Poletti et  
487 al., 2013). Microsaccades are not always initiated voluntarily, however, and recent studies claimed that  
488 they often occur after a period of low retinal slip and are executed to avoid fading (Engbert &  
489 Mergenthaler, 2006). Their occurrence seems to be coupled to heartbeat as well (Ohl, Wohltat, Kliegl,  
490 Pollatos, & Engbert, 2016). Based on the finding that microsaccades cause widespread activity across the  
491 visual system and help temporally synchronize neural activity, some researchers supported the view  
492 that microsaccades, among other FEM, contribute most to visual function (Martinez-Conde et al., 2013;  
493 Masquelier, Portelli, & Kornprobst, 2016; McCamy et al., 2012). In addition, a review of old and new  
494 literature on microsaccades led some researchers to conclude that microsaccades do not serve a useful  
495 purpose (Collewijn & Kowler, 2008). Nevertheless, in order to address these hypotheses, we performed

496 a series of analyses on microsaccades made by all observers (**Fig. 7**). Since the rate of microsaccades was  
497 rather low in our experiments, we combined the data across observers for the following analyses. The  
498 low rate of microsaccades itself, especially when retinal image motion was minimized, is an evidence  
499 against a primary role for microsaccades for visual processing. In response to partial or complete retinal  
500 stabilization for instance, subjects made larger drifts rather than larger or more frequent microsaccades.  
501 Moreover, we found evidence for both low retinal slip and gaze redirection, although the evidence for  
502 the latter was stronger. More specifically, we found that retinal image velocity was slightly reduced  
503 immediately before microsaccade onset, and most microsaccades were made to bring the retinal  
504 projection of the stimuli closer to the PRL.

505

506

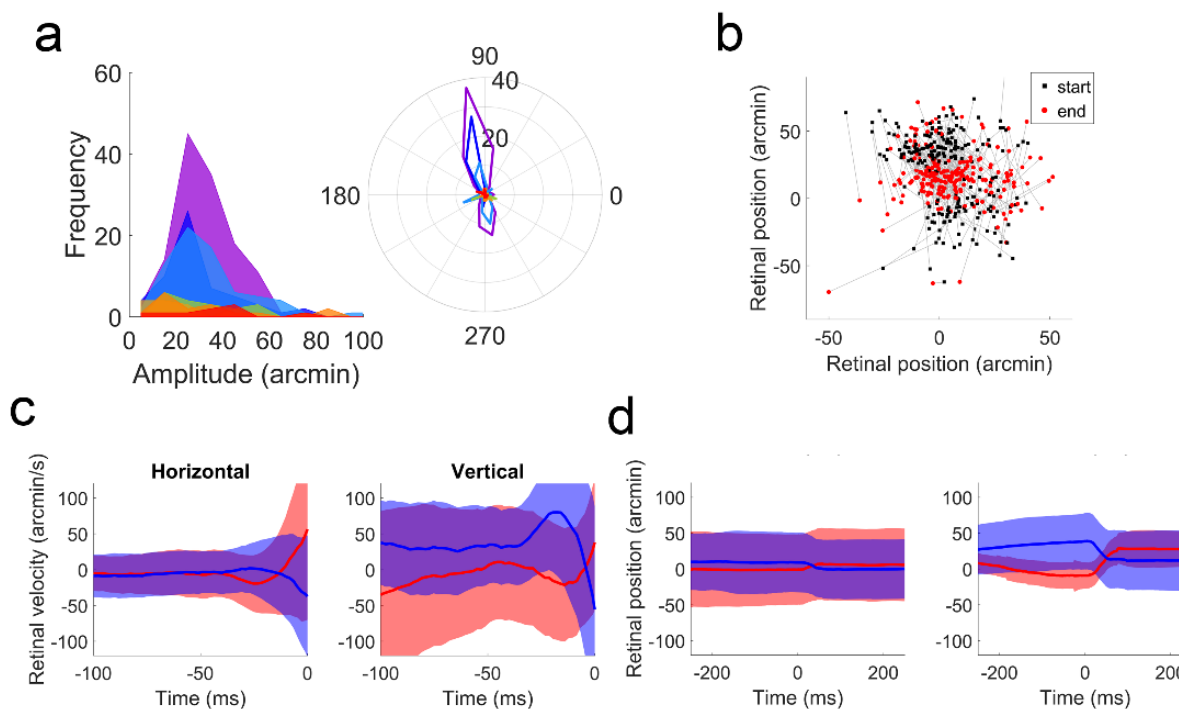

507

508 **Figure 7** Analyses of microsaccades. **(a)** Amplitude and direction distribution of microsaccades, combined  
509 across seven subjects, in Experiment 1. **(b)** The retinal position of the stimuli at the start (black squares)  
510 and end (red circles) of microsaccades. Clearly, the primary role of microsaccades was redirecting gaze to  
511 compensate for non-homogeneous vision. **(c)** Retinal image velocity just before microsaccades. The blue  
512 and red lines represent downward and upward microsaccades (within  $\pm 45^\circ$  from vertical was considered  
513 as upward). **(d)** Retinal position of the stimuli across microsaccades. In **(c)** and **(d)**, the panels on the left  
514 and right represent data from horizontal and vertical component of the eye movements, respectively.

515

## 516 Ocular drifts

517 There are several other facts to be considered when functional roles of drifts and microsaccades are to  
518 be determined. First, RGCs are most responsive to light transients, and the time constant of their  
519 responses can vary from 30 to 100 ms (Brien, Isayama, Richardson, Berson, & O'Brien, 2002). Second,  
520 although the initial burst activity of RGCs in response to a light transient is highly precise, prolonged



521 presentation breaks this temporal synchrony, and the tonic neural activity demonstrates quite a bit of  
522 variability (Berry, Warland, & Meister, 1997; Reich, Victor, Knight, Ozaki, & Kaplan, 1997). Encoding  
523 spatial information using a rate code with a few spikes necessitates the accumulation of information  
524 over time to improve the signal to noise ratio. The presence of FEM makes encoding of spatial  
525 information via rate coding even less reliable by further increasing variability in spiking activity. Third,  
526 FEM create retinal motion signals that are well beyond motion detection thresholds but not perceived.

527 From an evolutionary standpoint, it is unclear which of the facts listed so far was the root cause for the  
528 others. For instance, whether RGCs prefer light transients and do not respond as strongly after  
529 prolonged presentation due to FEM, or FEM exist due to the temporal characteristics of RGC responses  
530 is a hard problem to address. In addition, a recent modeling work demonstrated potential alternatives  
531 to spatial encoding via rate coding, where FEM do not pose problems to be solved by the visual system,  
532 but instead they are part of the solution to efficient information encoding (Ahissar & Arieli, 2012). This  
533 also renders the mystery of how the visual system differentiates motion due to FEM from those of  
534 external objects a non-issue since if we actually see via FEM, why correct for them? In fact, drifts  
535 transform the spectral content of retinal stimulation into spatiotemporal frequencies to which the early  
536 visual system is most sensitive (Kuang et al., 2012), but it is unclear whether this is an epiphenomenon  
537 or a result targeted by an active and/or adaptive process. However, the current implementation of this  
538 model relies on weak assumptions, one of which is that drifts are cyclic (sinusoidal) motions (to drive  
539 phase-locking mechanism) within time courses that reflect average fixation duration (~300 ms). Except  
540 in very few instances, we did not observe such patterns (**Fig. 8**).

541

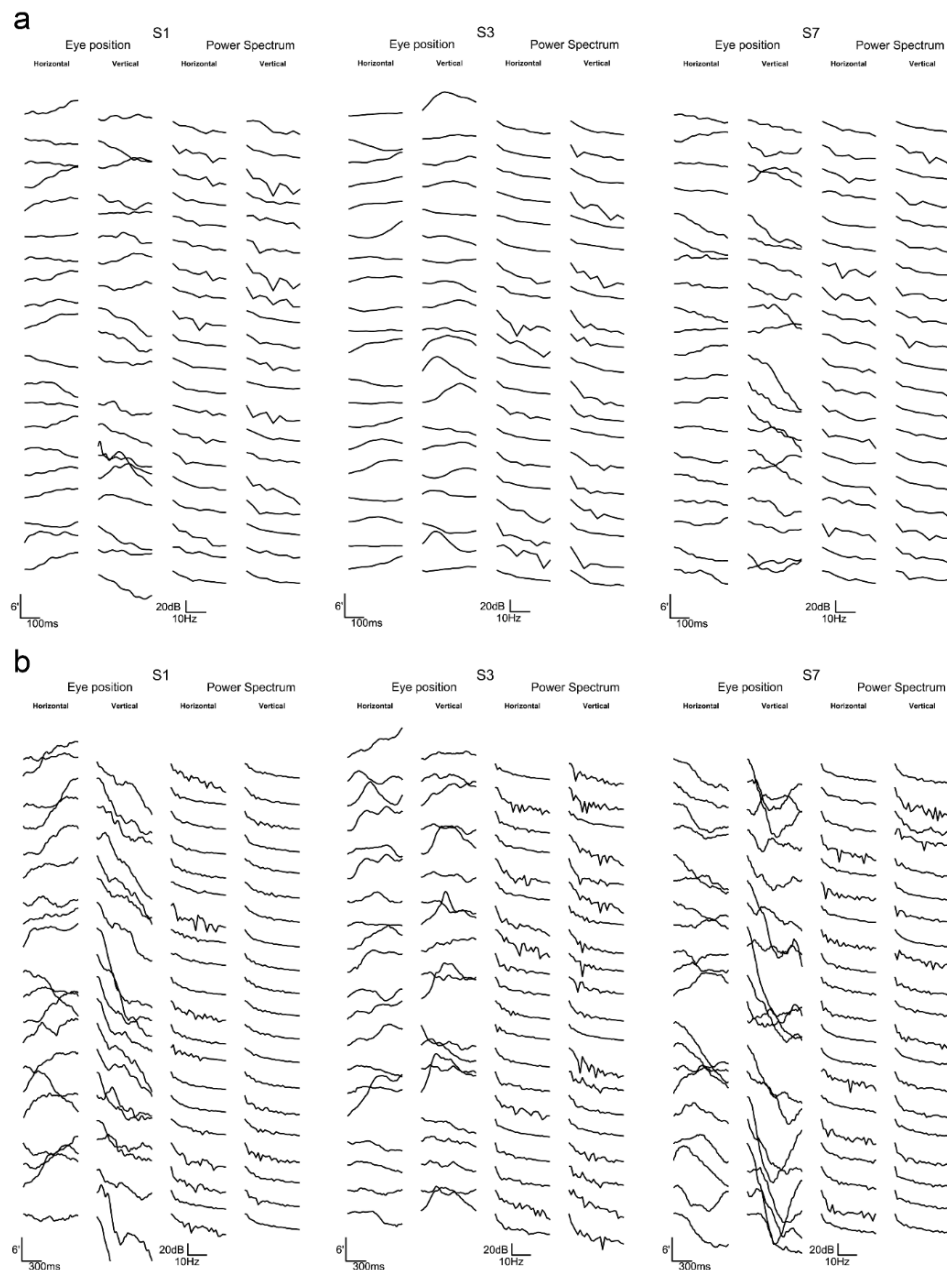

542

543 **Figure 8** Ocular drifts under normal viewing conditions. To qualitatively test the assumption that drifts  
 544 are cyclic motions within the time scale of typical fixation (~300 ms), we randomly sampled 20 eye  
 545 position traces from three subjects in the zero-gain condition, and computed the power spectra of both  
 546 the horizontal and vertical components in (a) a 300 ms and (b) ~900 ms time windows. If indeed, drifts  
 547 show three to five cycles per ~300 ms, this should be visible as clear peaks in the power spectra, and  
 548 disappear when power spectra are computed over a longer time scale. However, except for a few cases,  
 549 we did not encounter such motions. For some subjects, much lower-frequency fluctuations were visible,  
 550 but these fluctuations are too slow to be of any use for fast and efficient temporal encoding. For this  
 551 particular figure, eye position traces were further filtered with a low-pass filter with a cut-off frequency  
 552 of 25 Hz. Power spectra are shown with a linear frequency axis with limits from 3 to 30 Hz.

553

554

## 555 **Abnormal FEM**

556 Some visual/cortical impairments (e.g., amblyopia, central vision loss) result in “abnormal” FEM (Chung,  
557 Kumar, Li, & Levi, 2015; Kumar & Chung, 2014). In a computer vision system with limited spatial  
558 resolution or blurry optics, it is theoretically possible to achieve “super-resolution” or de-blurring by  
559 moving a sensor array. Therefore, we think that to classify FEM as abnormal, one needs to consider  
560 several factors such as the amount of blur, receptive field sizes, and contrast sensitivity at the PRL.  
561 Otherwise, a genuine strategy of a perfectly normal oculomotor system might be misinterpreted as an  
562 artifact. In the case of central vision loss, the use of peripheral PRL leads to changes in all these factors,  
563 and it is quite possible that apparently abnormal FEM in these patients might be a way to compensate  
564 for these changes. In fact, recent studies on the effects of retinal image motion in peripheral vision  
565 reported improvements in reading and discrimination performance with increased motion (Patrick,  
566 Roach, & McGraw, 2017; Watson et al., 2012).

## 567 **Limitations and future directions**

568 The statistics of FEM may change when a subject’s head is restrained compared to head-free viewing  
569 (Poletti, Aytekin, & Rucci, 2015). The amplitudes of FEM increase under free viewing. Measurements  
570 using a Dual-Purkinje tracker showed that drifts from the two eyes show minimal correlation under  
571 head-fixed conditions, and they become mostly conjugate under head-free conditions. However, retinal  
572 imaging via a binocular TSLO revealed almost complete conjugacy under head-fixed conditions  
573 (Stevenson, Sheehy, & Roorda, 2016). Nonetheless, the conditions reported here may demonstrate a  
574 special case of oculomotor control, which need not be optimized since outside the laboratory, we  
575 always view the environment with freely moving body and head. In addition, since the stimulus  
576 presentation was monocular in the present study, it remains to be seen whether similar tuning functions  
577 would be obtained with binocular presentation. It may be that binocular viewing increases the tolerance  
578 of the visual system to retinal image motion due to FEM even for high spatial frequencies due to  
579 redundancy from the second eye. In addition, as mentioned before, varying retinal image motion while  
580 keeping the eye motion unaffected remains to be a challenge. Finally, the different patterns of results in  
581 the two experiments reported here also suggest that the relationship between FEM and spatial  
582 frequency might be a continuum, from no tuning to optimal tuning with increasing spatiotemporal  
583 frequency. Future endeavors along these lines will require denser sampling of the frequency space as  
584 well as accurate eye tracking combined with fast stimulus delivery to both eyes.

## 585 **Author contributions**

586 MNA and STLC conceived the idea and designed the experiments. MNA and STLC performed the  
587 experiments. MNA analyzed the data and wrote the manuscript. CKS, PT, and AR provided technical  
588 support for the TSLO system (hardware, electronics, and software), and CKS, PT, AR, and STLC reviewed  
589 the manuscript.

## 590 **Competing financial interests**

591 MNA and STLC have no financial interest. AR, CKS, and PT hold a patent for the design of the TSLO, and  
592 have financial interest in C.Light Technologies.

## 593 **Acknowledgements**

594 We would like to thank Jonathan Patrick, Arun Kumar Krishnan and Haluk Ogmen for his comments on  
595 the manuscript, and Harold Bedell for many discussions of our results. This study was supported by

596 grants R01-EY012810 (STLC), R01-EY017707 (STLC), R01-EY023591 (AR), P30-EY003176 (core grant) from  
597 the National Institutes of Health, and UCSF-CTSI grant TL1-TR001871 (CKS).

## 598 **References**

- 599 Ahissar, E., & Arieli, A. (2012). Seeing via Miniature Eye Movements: A Dynamic Hypothesis for Vision.  
600 *Frontiers in Computational Neuroscience*, 6, 89.
- 601 Anderson, A. G., Olshausen, B. A., Ratnam, K., & Roorda, A. (2017). A neural model of high-acuity vision  
602 in the presence of fixational eye movements. In *Conference Record - Asilomar Conference on*  
603 *Signals, Systems and Computers* (pp. 588–592). IEEE.
- 604 Arathorn, D. W., Stevenson, S., Yang, Q., Tiruveedhula, P., & Roorda, A. (2013). How the unstable eye  
605 sees a stable and moving world. *Journal of Vision*, 13, 1–19.
- 606 Arathorn, D. W., Yang, Q., Vogel, C. R., Zhang, Y., Tiruveedhula, P., & Roorda, A. (2007). Retinally  
607 stabilized cone-targeted stimulus delivery. *Optics Express*, 15(21), 13731.
- 608 Baron, R. M., & Kenny, D. A. (1986). The moderator–mediator variable distinction in social psychological  
609 research: Conceptual, strategic, and statistical considerations. *Journal of Personality and Social*  
610 *Psychology*, 51(6), 1173–1182.
- 611 Benardete, E. A., & Kaplan, E. (1997). The receptive field of the primate P retinal ganglion cell, I: Linear  
612 dynamics. *Visual Neuroscience*, 14(1997), 169–185.
- 613 Berry, M. J., Warland, D. K., & Meister, M. (1997). The structure and precision of retinal spike trains.  
614 *Proceedings of the National Academy of Sciences*, 94(10), 5411–5416.
- 615 Botev, Z. I., Grotowski, J. F., & Kroese, D. P. (2010). Kernel density estimation via diffusion. *The Annals of*  
616 *Statistics*, 38(5), 2916–2957. Statistics; Theory.
- 617 Brien, B. J. O., Isayama, T., Richardson, R., Berson, D. M., & O'Brien, B. J. (2002). Intrinsic physiological  
618 properties of cat retinal ganglion cells. *The Journal of Physiology*, 538(Pt 3), 787–802.
- 619 Burak, Y., Rokni, U., Meister, M., & Sompolinsky, H. (2010). Bayesian model of dynamic image  
620 stabilization in the visual system. *Proceedings of the National Academy of Sciences*, 107(45),  
621 19525–19530.
- 622 Burak, Y., Rokni, U., Meister, M., & Sompolinsky, H. (2011). Reply to Wehrhahn: Experimental  
623 requirements for testing the role of peripheral cues in dynamic image stabilization. *Proc Natl Acad*  
624 *Sci U S A*, 108(10), E36.
- 625 Castet, E., & Crossland, M. (2012). Quantifying Eye Stability During a Fixation Task: A Review of  
626 Definitions and Methods. *Seeing and Perceiving*, 25(5), 449–469.
- 627 Chung, S. T. L., Kumar, G., Li, R. W., & Levi, D. M. (2015). Characteristics of fixational eye movements in  
628 amblyopia: Limitations on fixation stability and acuity? *Vision Research*, 114, 87–99.
- 629 Collewijn, H., & Kowler, E. (2008). The significance of microsaccades for vision and oculomotor control.  
630 *Journal of Vision*, 8(14)(20), 1–21.
- 631 Coppola, D., & Purves, D. (1996). The extraordinarily rapid disappearance of entopic images. *Proceedings*  
632 *of the National Academy of Sciences*, 93(15), 8001–8004.

- 633 Cornsweet, T. N. (1956). Determination of the Stimuli for Involuntary Drifts and Saccadic Eye  
634 Movements. *Journal of the Optical Society of America*, 46(11), 987–988.
- 635 Costela, F. M., McCamy, M. B., Macknik, S. L., Otero-Millan, J., & Martinez-Conde, S. (2013).  
636 Microsaccades restore the visibility of minute foveal targets. *PeerJ*, 1, e119.
- 637 Curcio, C., Sloan, K., Kalina, R., & Hendrickson, A. (1990). Human photoreceptor topography. *J Comp*  
638 *Neurol.*, 4(292), 497–523.
- 639 Dacey, D. M., & Petersen, M. R. (1992). Dendritic field size and morphology of midget and parasol  
640 ganglion cells of the human retina. *Proceedings of the National Academy of Sciences of the United*  
641 *States of America*, 89(20), 9666–9670.
- 642 Daniel, R. M., De Stavola, B. L., Cousens, S. N., & Vansteelandt, S. (2015). Causal mediation analysis with  
643 multiple mediators. *Biometrics*, 71(1), 1–14.
- 644 Ditchburn, R. W., Fender, D. H., & Mayne, S. (1959). Vision with Controlled Movements of the Retinal  
645 Image. *Journal of Physiology*, 145, 98–107.
- 646 Ditchburn, R. W., & Ginsborg, B. L. (1952). Vision with a stabilized retinal image. *Nature*, 170, 36–37.
- 647 Ditchburn, R. W., & Ginsborg, B. L. (1953). Involuntary Eye Movements During Fixation. *Journal of*  
648 *Physiology*, 119(1940), 1–17.
- 649 Engbert, R., & Kliegl, R. (2003). Microsaccades uncover the orientation of covert attention. *Vision*  
650 *Research*, 43(9), 1035–1045.
- 651 Engbert, R., & Mergenthaler, K. (2006). Microsaccades are triggered by low retinal image slip.  
652 *Proceedings of the National Academy of Sciences of the United States of America*, 103(18), 7192–7.
- 653 Engbert, R., Mergenthaler, K., Sinn, P., & Pikovsky, A. (2011). An integrated model of fixational eye  
654 movements and microsaccades. *Proceedings of the National Academy of Sciences*, 108(39), E765–  
655 E770.
- 656 Gerrits, H. J. M., & Vendrik, A. J. H. (1970). Artificial movements of a stabilized image. *Vision Research*,  
657 10(12), 1443–1456.
- 658 Kaplan, E., & Benardete, E. (1999). The dynamics of primate M retinal ganglion cells. *Visual*  
659 *Neuroscience*, 16, 355–368.
- 660 Kelly, D. H. (1977). Visual Contrast Sensitivity. *Optica Acta: International Journal of Optics*, 24(2), 107–  
661 129.
- 662 Kelly, D. H. (1979a). Motion and vision. I. Stabilized images of stationary gratings. *Journal of the Optical*  
663 *Society of America*, 69(9), 1266–74.
- 664 Kelly, D. H. (1979b). Motion and vision. II. Stabilized spatio-temporal threshold surface. *Journal of the*  
665 *Optical Society of America*, 69(10), 1340–1349.
- 666 Ko, H. kyong, Snodderly, D. M., & Poletti, M. (2016). Eye movements between saccades: Measuring  
667 ocular drift and tremor. *Vision Research*, 122, 93–104.
- 668 Kowler, E. (2011). Eye movements: the past 25 years. *Vision Research*, 51(13), 1457–83.
- 669 Kuang, X., Poletti, M., Victor, J. D., & Rucci, M. (2012). Temporal encoding of spatial information during

- 670 active visual fixation. *Current Biology*, 22(6), 510–514.
- 671 Kumar, G., & Chung, S. T. L. (2014). Characteristics of fixational eye movements in people with macular  
672 disease. *Investigative Ophthalmology & Visual Science*, 55(8), 5125–33.
- 673 Kwon, M., Nandy, A. S., & Tjan, B. S. (2013). Rapid and persistent adaptability of human oculomotor  
674 control in response to simulated central vision loss. *Current Biology*, 23(17), 1663–1669.
- 675 MacKinnon, D. P., Fairchild, A. J., & Fritz, M. S. (2007). Mediation Analysis. *Annual Review of Psychology*,  
676 58(1), 593–614.
- 677 Martinez-Conde, S., Macknik, S. L., & Hubel, D. H. (2004). The role of fixational eye movements in visual  
678 perception. *Nat Rev Neurosci*, 5(3), 229–240.
- 679 Martinez-Conde, S., Otero-Millan, J., & Macknik, S. L. (2013). The impact of microsaccades on vision:  
680 towards a unified theory of saccadic function. *Nature Reviews. Neuroscience*, 14(2), 83–96.
- 681 Masquelier, T., Portelli, G., & Kornprobst, P. (2016). Microsaccades enable efficient synchrony-based  
682 coding in the retina: a simulation study. *Scientific Reports*, 6(October 2015), 24086.
- 683 McCamy, M. B., Otero-Millan, J., Macknik, S. L., Yang, Y., Troncoso, X. G., Baer, S. M., ... Martinez-Conde,  
684 S. (2012). Microsaccadic Efficacy and Contribution to Foveal and Peripheral Vision. *Journal of*  
685 *Neuroscience*, 32(27), 9194–9204.
- 686 Mulligan, J. B. (1997). Recovery of motion parameters from distortions in scanned images. *Proceedings*  
687 *of the Image Registration Workshop*, 281–292.
- 688 Murakami, I., & Cavanagh, P. (1998). A jitter after-effect reveals motion-based stabilization of vision.  
689 *Nature*, 395(6704), 798–801.
- 690 Ohl, S., Wohltat, C., Kliegl, R., Pollatos, O., & Engbert, R. (2016). Microsaccades Are Coupled to  
691 Heartbeat. *Journal of Neuroscience*, 36(4), 1237–1241.
- 692 Otero-Millan, J., Troncoso, X. G., Macknik, S. L., Serrano-Pedraza, I., & Martinez-Conde, S. (2008).  
693 Saccades and microsaccades during visual fixation, exploration, and search: Foundations for a  
694 common saccadic generator. *Journal of Vision*, 8(14), 21–21.
- 695 Patrick, J. A., Roach, N. W., & McGraw, P. V. (2017). Motion-based super-resolution in the peripheral  
696 visual field. *Journal of Vision*, 17(9), 15.
- 697 Pitkow, X., Sompolinsky, H., & Meister, M. (2007). A neural computation for visual acuity in the presence  
698 of eye movements. *PLoS Biology*, 5(12), 2898–2911.
- 699 Poletti, M., Aytekin, M., & Rucci, M. (2015). Head-Eye Coordination at a Microscopic Scale. *Current*  
700 *Biology*, 25(24), 3253–3259.
- 701 Poletti, M., Listorti, C., & Rucci, M. (2010). Stability of the visual world during eye drift. *The Journal of*  
702 *Neuroscience*: *The Official Journal of the Society for Neuroscience*, 30(33), 11143–50.
- 703 Poletti, M., Listorti, C., & Rucci, M. (2013). Microscopic eye movements compensate for  
704 nonhomogeneous vision within the fovea. *Current Biology*, 23(17), 1691–1695.
- 705 Ratliff, F., & Riggs, L. (1950). Involuntary motions of the eye during monocular fixation. *J Exp Psychol*,  
706 40(6), 687–701.

- 707 Ratnam, K., Harmening, W. M., & Roorda, A. (2017). Benefits of retinal image motion at the limits of  
708 spatial vision. *Journal of Vision*, *17*((1):30), 1–11.
- 709 Reich, D. S., Victor, J. D., Knight, B. W., Ozaki, T., & Kaplan, E. (1997). Response variability and timing  
710 precision of neuronal spike trains in vivo. *Journal of Neurophysiology*, *77*(5), 2836–41.
- 711 Riggs, L. A., Ratliff, F., Cornsweet, J. C., & Cornsweet, T. N. (1953). The disappearance of steadily fixated  
712 visual test objects. *Journal of the Optical Society of America*, *43*(6), 495–501.
- 713 Riggs, L. A., & Tulunay, S. U. (1959). Visual effects of varying the extent of compensation for eye  
714 movements. *Journal of the Optical Society of America*, *49*(8), 741–745.
- 715 Rucci, M., Iovino, R., Poletti, M., & Santini, F. (2007). Miniature eye movements enhance fine spatial  
716 detail. *Nature*, *447*(7146), 852–855.
- 717 Rucci, M., & Poletti, M. (2015). Control and Functions of Fixational Eye Movements. *Annual Review of*  
718 *Vision Science*, *1*(1), annurev-vision-082114-035742.
- 719 Sheehy, C. K., Yang, Q., Arathorn, D. W., Tiruveedhula, P., de Boer, J. F., & Roorda, A. (2012). High-speed,  
720 image-based eye tracking with a scanning laser ophthalmoscope. *Biomedical Optics Express*, *3*(10),  
721 2611.
- 722 Skavenski, A. A., Hansen, R. M., Steinman, R. M., & Winterson, B. J. (1979). Quality of retinal image  
723 stabilization during small natural and artificial body rotations in man. *Vision Research*, *19*(6), 675–  
724 683.
- 725 Stevenson, S. B., Sheehy, C. K., & Roorda, A. (2016). Binocular eye tracking with the Tracking Scanning  
726 Laser Ophthalmoscope. *Vision Research*, *118*, 98–104.
- 727 Watson, A. B. (2016). A formula for human retinal ganglion cell receptive field density as a function of  
728 visual field location. *Journal of Vision*, *14*(2014), 1–17.
- 729 Watson, L. M., Strang, N. C., Scobie, F., Love, G. D., Seidel, D., & Manahilov, V. (2012). Image jitter  
730 enhances visual performance when spatial resolution is impaired. *Investigative Ophthalmology and*  
731 *Visual Science*, *53*(10), 6004–6010.
- 732 Wehrhahn, C. (2011). Psychophysical and physiological evidence contradicts a model of dynamic image  
733 stabilization. *Proceedings of the National Academy of Sciences*, *108*(10), E35–E35.
- 734 Yang, Q., Arathorn, D. W., Tiruveedhula, P., Vogel, C. R., & Roorda, A. (2010). Design of an integrated  
735 hardware interface for AOSLO image capture and cone-targeted stimulus delivery. *Optics Express*,  
736 *18*(17), 17841.
- 737 Yarbus, A. L. (1967). Perception of Objects Stationary Relative to the Retina. In *Eye Movements and*  
738 *Vision* (pp. 59–101). Boston, MA: Springer US.
- 739
